# Supplementary material for: “Dragging mode” electrohydrodynamic jet printing of polymer-wrapped semiconducting single-walled carbon nanotubes for NO gas-sensing field-effect transistors
Source: Royal Society of Chemistry journal article supplement (doi:10.1039/d1tc04638a), 2021-01-01
Supplement: d1tc04638a1.pdf [file d1tc04638a1.pdf]

Supplementary Data

# “Dragging mode” Electrohydrodynamic Jet Printing of Polymer-Wrapped Semiconducting Single-Walled Carbon Nanotube for NO Gas-Sensing Field-Effect Transistors

Xiaowu Tang,<sup>†a</sup> Henok Getachew Girma,<sup>†bc</sup> Zhijun Li,<sup>d</sup> Jisu Hong,<sup>e</sup> Bogyu Lim,<sup>b</sup> Seo-Hyun Jung,<sup>b</sup> Yejin Kim,<sup>b</sup> Sang Yong Nam,<sup>e</sup> Kyunghun Kim,<sup>\*f</sup> Hoyoul Kong<sup>\*h</sup> and Se Hyun Kim<sup>\*d</sup>

<sup>a</sup>College of Material and Chemical Engineering, Zhengzhou University of Light Industry, Zhengzhou, Henan 450002, China

<sup>b</sup>Center for Advanced Specialty Chemicals, Korea Research Institute of Chemical Technology (KRICT), Ulsan 44412, Republic of Korea.

<sup>c</sup>Advanced Materials and Chemical Engineering, University of Science and Technology (UST), Daejeon 34113, Republic of Korea.

<sup>d</sup>School of Chemical Engineering, Yeungnam University, Gyeongsan 38541, Republic of Korea. E-mail: shkim97@yu.ac.kr

<sup>e</sup>Research Institute for Green Energy Convergence Technology (RIGET), Gyeongsang National University, Jinju 52828, Republic of Korea.

<sup>f</sup>Inorganic Material Lab., Samsung Advanced Institute of Technology (SAIT), Suwon, 16678, Republic of Korea. E-mail: kkhspecial@gmail.com

<sup>h</sup>Department of Chemistry and Research Institute of Nature Science, Gyeongsang National University, Gyeongnam 52828, Republic of Korea. E-mail: hoyoulkong@gnu.ac.kr

## Corresponding Authors

\*E-mails: kkhspecial@gmail.com (K. Kim) hoyoulkong@gnu.ac.kr (*H. Kong*),

shkim97@yu.ac.kr (S. H. Kim)

†X. T. and H. G. G. contributed equally to this work.

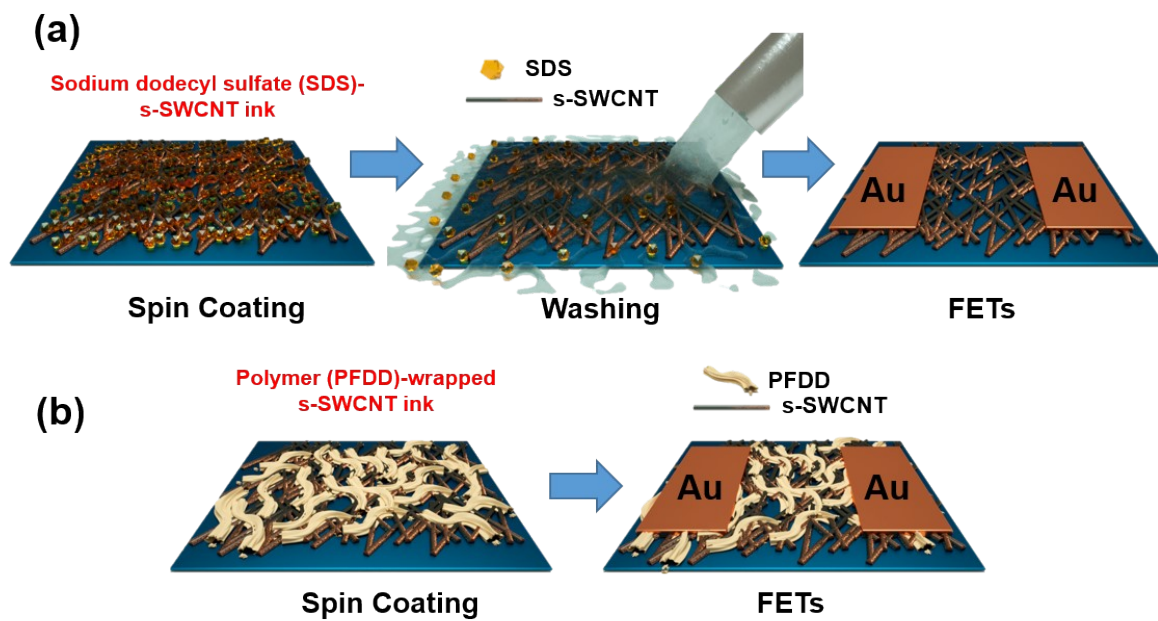

**Figure S1.** (a) The production process of non-polymer wrapping SDS-s-SWCNTs. (b) The production process of polymer wrapping PFDD-s-SWCNTs.

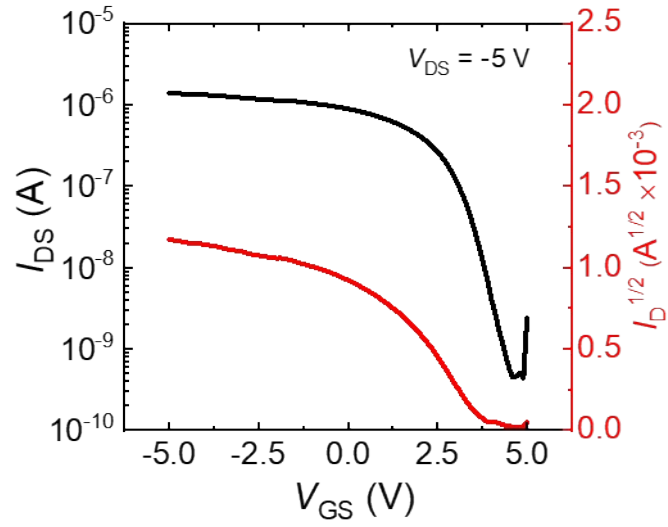

**Figure S2.** Transfer characteristics of the FETs for SDS-s-SWCNT.

**Table S1.** Electrical characteristics of the SDS-s-SWCNTs FETs depending on the spin coating.

| Spin Coating | $\mu_{\text{FET}}$<br>( $\text{cm}^2/(\text{V}\cdot\text{s})$ ) | $V_{\text{th}}$<br>(V) | $I_{\text{on}}/I_{\text{off}}$ | SS<br>(V/dec) |
|--------------|-----------------------------------------------------------------|------------------------|--------------------------------|---------------|
| SDS-s-SWCNT  | $2.78 \pm 0.03$                                                 | 4.16                   | $3.12 \times 10^3$             | 0.614         |

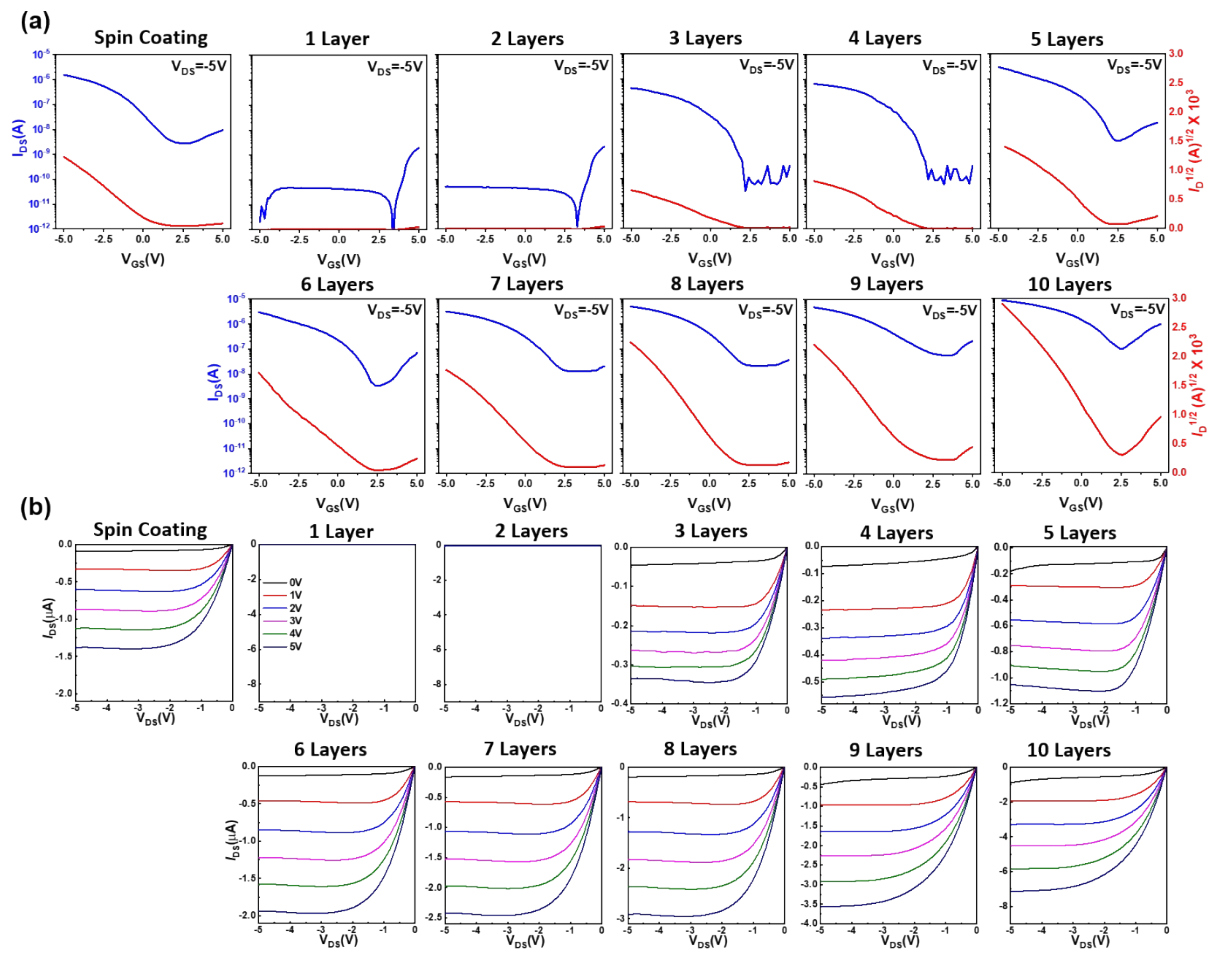

**Figure S3.** (a) Transfer and (b) Output characteristics of the PFDD-s-SWCNTs FETs depending on the number of layers.

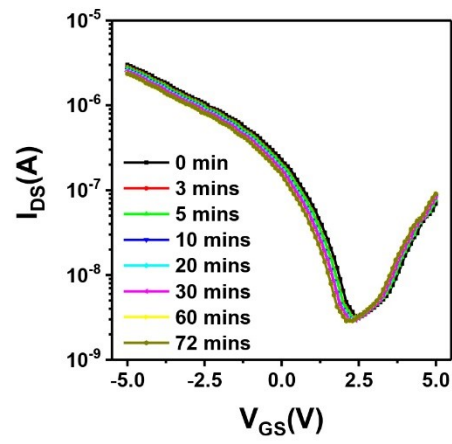

**Figure S4.** Transfer characteristics of the PFDD-*s*-SWCNTs FETs according to the sustained gate-bias stress ( $V_G = -5$  V) for 72 min. The number of layers of the PFDD-*s*-SWCNTs is six.
